# Supplementary material
Source: publisher figshare collection journal article supplement (https://acs.figshare.com/ndownloader/files/22034406)
Supplement: Supplementary file 1 [file 22034406]

# DeeplyTough: Learning Structural Comparison of Protein Binding Sites (Supporting Information)

Martin Simonovsky<sup>\*,†,‡,¶</sup> and Joshua Meyers<sup>\*,†</sup>

<sup>†</sup>*BenevolentAI, London W1T 5HD, United Kingdom*

<sup>‡</sup>*École des Ponts ParisTech, 77455 Champs sur Marne, France*

<sup>¶</sup>*Université Paris-Est, 77455 Champs sur Marne, France*

E-mail: martin.simonovsky@enpc.fr; joshua.meyers@benevolent.ai

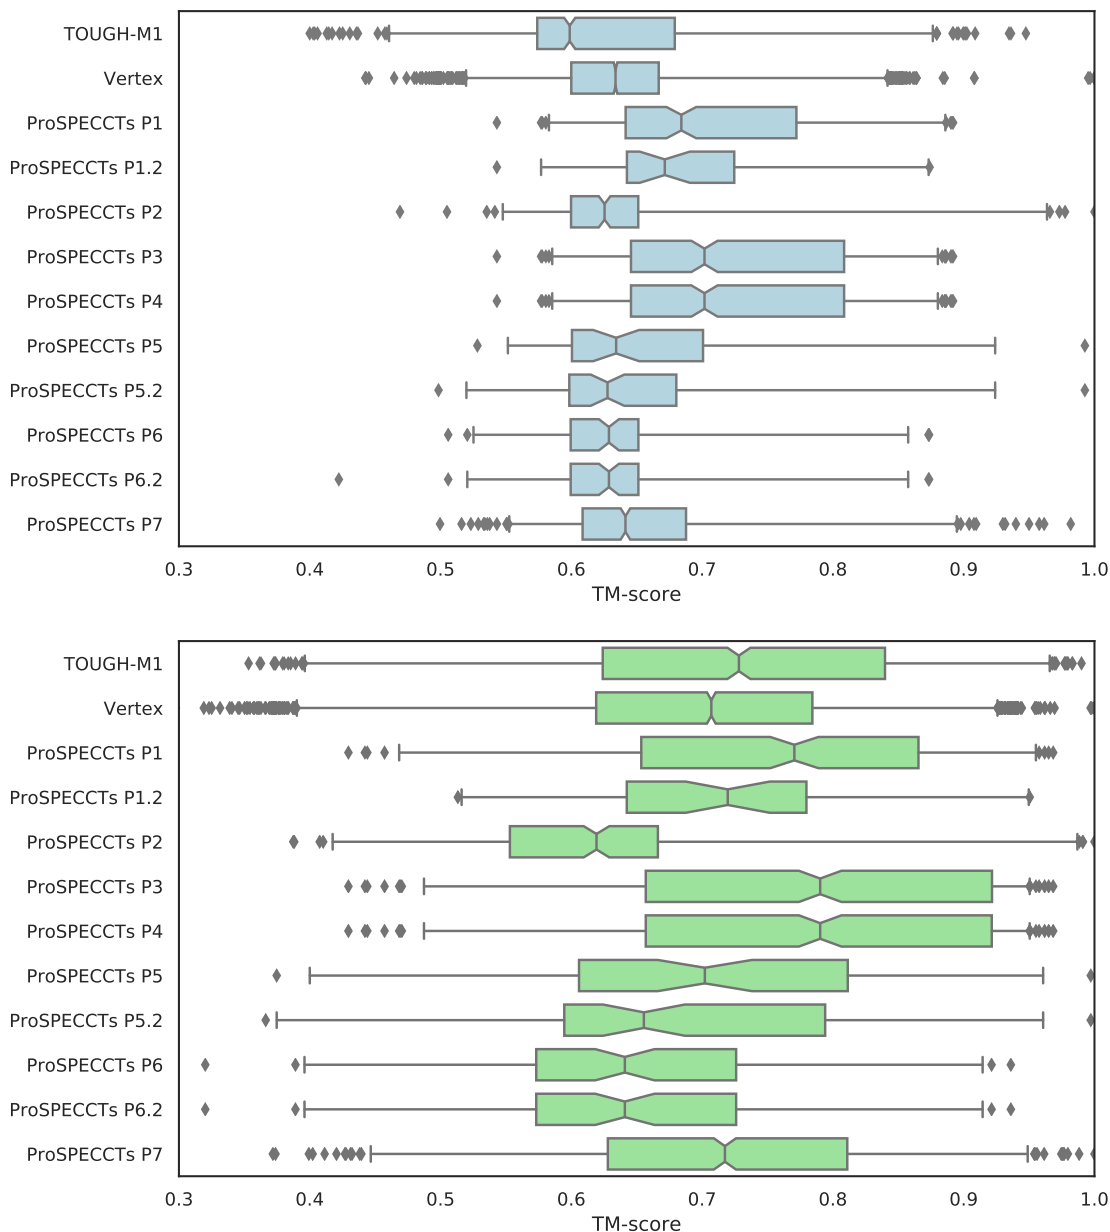

Figure S1: Box plots of TM-scores indicating the structural similarity of pockets in a test set to their nearest neighbor pockets in a training set (again, in terms of TM-score) for each training scenario in this work. For TOUGH-M1 dataset, a single random permutation out of ten is visualized. The scores are computed with TM-align<sup>1</sup>, with 1.0 indicating identity and 0.0 no alignment. Whiskers mark 1% and 99% percentiles of a distribution. Pockets in TOUGH-M1 can be defined in two ways: i) computationally with Fpocket 2.0<sup>2</sup> as used for training DeeplyTough (blue plots; top), or ii) around their bound ligands as in Vertex and ProSPECCTs (green plots; bottom). In general, the distributions suggest that there is no strong contamination between training and test sets (especially with computationally defined pockets), with only several pocket pairs being near-identical.

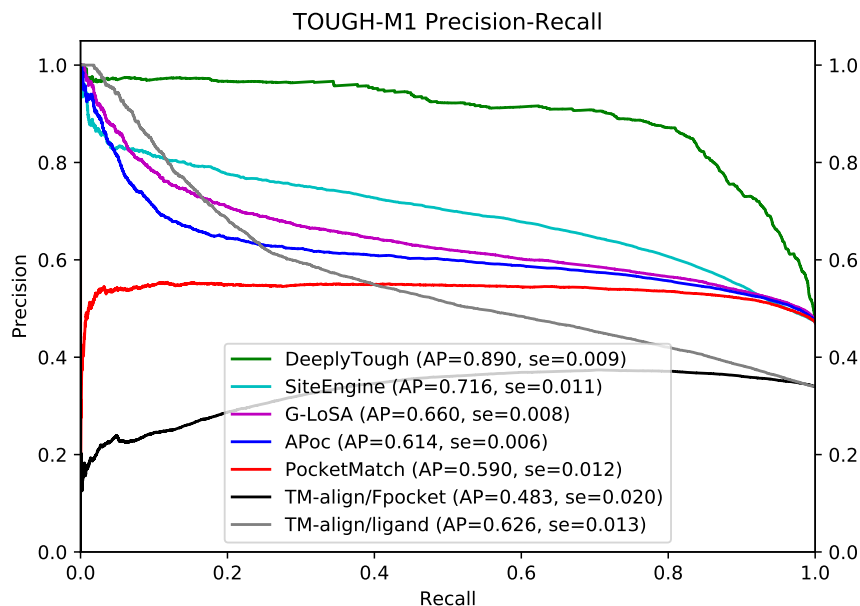

Figure S2: Precision-recall plot with associated average precision (AP) values evaluating the performance of pocket matching algorithms on TOUGH-M1 testing folds. Standard error, denoted as *se*, is measured over ten random splits.

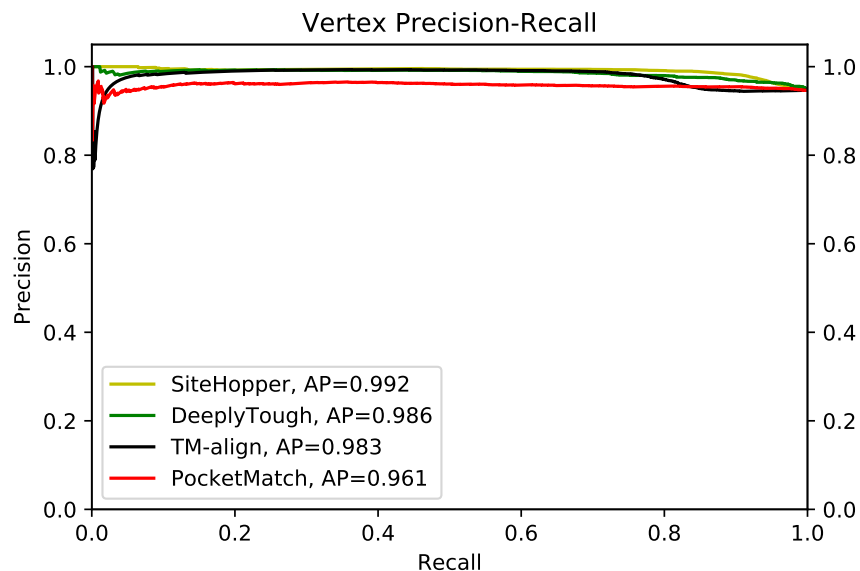

Figure S3: Precision-recall plot with associated average precision (AP) values evaluating the performance of pocket matching algorithms on the Vertex dataset (6,977 protein pairs).

Table S1: AP values for DeeplyTough on each of ten ProSPECCTs datasets.

|             | P1   | P1.2 | P2   | P3   | P4   | P5   | P5.2 | P6   | P6.2 | P7   |
|-------------|------|------|------|------|------|------|------|------|------|------|
| DeeplyTough | 0.78 | 0.90 | 0.57 | 0.76 | 0.77 | 0.33 | 0.28 | 0.37 | 0.37 | 0.45 |

## References

- (1) Zhang, Y.; Skolnick, J. TM-align: A Protein Structure Alignment Algorithm Based on the TM-score. *Nucleic acids research* **2005**, *33*, 2302–2309.
- (2) Le Guilloux, V.; Schmidtke, P.; Tuffery, P. Fpocket: An Open Source Platform for Ligand Pocket Detection. *BMC Bioinform.* **2009**, *10*.
